# Supplementary material for: Platelet P2Y12 Inhibitor in the Treatment and Prevention of Migraine: A Systematic Review and Meta-Analysis
Source: Hindawi journal article supplement (doi:10.1155/2022/2118740), 2022-03-20
Supplement: f1 [file 2118740.f1.pdf]

**Supplemental Table 1.** Modified Jadad score for included randomized controlled trials

| <b>Study</b>                    | <b>Sequence generation</b> | <b>Randomization concealment</b> | <b>Blinding</b> | <b>Withdrawals and dropouts descriptions</b> | <b>Total Score*</b> |
|---------------------------------|----------------------------|----------------------------------|-----------------|----------------------------------------------|---------------------|
| Chambers et al <sup>9</sup>     | 2                          | 2                                | 2               | 1                                            | 7                   |
| Rodés-Cabau et al <sup>14</sup> | 2                          | 2                                | 2               | 1                                            | 7                   |

\*Scores: 0-7 points; poor quality if  $\leq 3$
